# Supplementary material for: Nisin S, a Novel Nisin Variant Produced by Ligilactobacillus salivarius P1CEA3
Source: MDPI journal article supplement (doi:10.3390/ijms24076813), 2023-04-06
Supplement: s1 [file s1]

**Table S1.** Growth of *L. salivarius* P1CEA3 in different media and antimicrobial activity and specific antimicrobial activity of their cell-free supernatants (CFSs), against *P. damnosus* CECT 4797 as the indicator microorganism.

| Growth time (h) | Volume (ml) | Growth medium | Culture (OD <sub>600</sub> ) | Antimicrobial activity (BU/ml) | Specific antimicrobial activity ([BU/ml]/OD <sub>600</sub> ) |
|-----------------|-------------|---------------|------------------------------|--------------------------------|--------------------------------------------------------------|
| 16              | 10          | TSB           | 0.830                        | 3,436                          | 4,140                                                        |
| 16              | 10          | BHI           | 1.350                        | 1,147                          | 850                                                          |
| 16              | 10          | MRS           | 4.130                        | 144                            | 35                                                           |
| 24              | 1,000       | TSB           | 0.055                        | 231                            | 4,200                                                        |
| 48              | 1,000       | TSB           | 0.649                        | 11,525                         | 17,758                                                       |
| 72              | 1,000       | TSB           | 0.608                        | 18,513                         | 30,449                                                       |
| 120             | 1,000       | TSB           | 0.605                        | 18,021                         | 29,787                                                       |
| 148             | 1,000       | TSB           | 0.600                        | 10,305                         | 17,175                                                       |

**Table S2.** Hypothetical functionality and identity of the SalB/Abp118 gene cluster from *L. salivarius* P1CEA3 and *L. salivarius* UCC118.

| <i>L. salivarius</i> P1CEA3<br>ORF (gene) <sup>a</sup> | Size (aa)   | Hypothetical functionality                    | Closest protein homologue<br>from <i>L. salivarius</i> UCC118<br>(Abp118 producer) | % identity<br>(% cover) |
|--------------------------------------------------------|-------------|-----------------------------------------------|------------------------------------------------------------------------------------|-------------------------|
| ORF1                                                   | 323         | Thioredoxin family protein                    | ORF1                                                                               | 87 (100)                |
| ORF2                                                   | 61          | Hypothetical protein                          | No hits                                                                            | -                       |
| ORF3                                                   | 87          | Hypothetical protein                          | ORF2                                                                               | 98 (100)                |
| ORF4 ( <i>salB</i> )                                   | 57          | Bacteriocin                                   | ORF3 ( <i>salB</i> )                                                               | 98 (100)                |
| ORF5                                                   | 85          | Bacteriocin                                   | ORF5                                                                               | 100 (100)               |
| ORF6 ( <i>abp118α</i> )                                | 64          | Abp118α bacteriocin                           | ORF6 ( <i>abp118α</i> )                                                            | 100 (100)               |
| ORF7 ( <i>abp118β</i> )                                | 68          | Abp118β bacteriocin                           | ORF7 ( <i>abp118β</i> )                                                            | 100 (100)               |
| ORF8 ( <i>abpIM</i> )                                  | 55          | AbpIM bacteriocin<br>immunity protein         | ORF8 ( <i>abpIM</i> )                                                              | 89 (100)                |
| ORF9 ( <i>abpIP</i> )                                  | 38          | AbpIP bacteriocin inducer<br>peptide          | ORF9 ( <i>abpIP</i> )                                                              | 100 (100)               |
| ORF10, 11, 12 ( <i>abpK*</i> )                         | 17, 166, 75 | AbpK sensory transduction<br>histidine kinase | ORF10 ( <i>abpK</i> )                                                              | 79 (75)                 |
| ORF13 ( <i>abpR</i> )                                  | 264         | AbpR bacteriocin response<br>regulator        | ORF11 ( <i>abpR</i> )                                                              | 97 (100)                |
| ORF14                                                  | 79          | Hypothetical protein                          | ORF12                                                                              | 92 (100)                |
| ORF15                                                  | 65          | Hypothetical protein                          | No hits                                                                            | -                       |
| ORF16                                                  | 44          | Hypothetical protein                          | No hits                                                                            | -                       |
| ORF17                                                  | 283         | Hypothetical protein                          | ORF15,16                                                                           | 85 (100)                |
| ORF18                                                  | 88          | Hypothetical protein                          | ORF17                                                                              | 95 (100)                |
| ORF19                                                  | 273         | Site-specific integrase                       | ORF18                                                                              | 98 (100)                |
| ORF20                                                  | 656         | Fructose-bisphosphatase<br>class III          | ORF19                                                                              | 99 (100)                |

<sup>a</sup> *abpK\** corresponds to the truncated version of the *abpK* gene from *L. salivarius* UCC118.

**Table S3.** Amino acid sequence of natural nisin variants.

| Nisin                  | Leader sequence           | Mature peptide <sup>a</sup>                                   |
|------------------------|---------------------------|---------------------------------------------------------------|
| Nisin A                | MSTKDFNLDLVSVSKKDSGASPR   | ITSISLCTPGCKTGALMGCNMKTATCHCSIHVSK                            |
| Nisin Z                | MSTKDFNLDLVSVSKKDSGASPR   | ITSISLCTPGCKTGALMGCNMKTATCNCSIHVSK                            |
| Nisin Q                | MSTKDFNLDLVSVSKTDSGASTR   | ITSISLCTPGCKTGVLMSGNLKTATCNCSVHVSK                            |
| Nisin U                | MNNEFDNLDLIKISKENNSGASPR  | ITSKSLCTPGCKTGILMTCPPLKTATCGCHFG                              |
| Nisin U2               | MSTKDFNLDLVSVSKKDSGASPR   | VISKSLCTPGCKTGILMTCPPLKTATCGCHFG                              |
| Nisin F                | MSTKDFNLDLVSVSKKDSGASPR   | ITSISLCTPGCKTGALMGCNMKTATCNCSVHVSK                            |
| Salivaricin D          | MSTKDFNLDLVEVSKSNTGASAR   | FTSHSLCTPGCITGVLMSGCHIQSIGNVVHIHISK                           |
| Nisin H                | MSTNDFNLDLVSVSKSNAGASTR   | FTSISMCTPGCKTGALMTCNKYKTATCHCSIKVSK                           |
| Nisin O <sub>1-2</sub> | MGKFDDFDLDVTKTAAQGGIEPK   | YKSKSACTPGCPTGILMTCPPLKTATCGCHITGK                            |
| Nisin O <sub>3</sub>   | MAKFDDFDLDVTKTAAQGGIEPK   | YKSKSACTPGCPTGILMTCPPLKTATCGCHITGK                            |
| Nisin O <sub>4</sub>   | MAKFDDFDLDIIEKKVRRDIIPAS  | TSQHSFCTPNCLTGFLCPPKTQLTCTCKLKGQ                              |
| Nisin J                | MNNQFNLSKSKSANVSGSKGNLETR | ITSKSLCTPGCKTGALQTCTFAKTATCHCSGHVHTK                          |
| Nisin P                | MNNEFDNLDLVTISKENNSGASPR  | VTSKSLCTPGCKTGILMTCAIKTATCGCHFG                               |
| Kunkecin A             | MSNFNDFNLGIKKVHSGSKKGLEPR | ITSYVLCTPGCITGRLMGCNNKTKTCHCHSSNHFSFHAR                       |
| Nisin G                | MSTNDFNLDLVSVSKSNAGASTR   | ITSYSLCTPGCKTGVLMAACHLKTATCNCSIIVSK                           |
| Nisin E                | MSNEFDNLDLVSVSKSNSGASPR   | ITSKSLCTPGCKTGALMTCPIKTATCGCHFGN                              |
| <b>Nisin S</b>         | MSVNDFKLDLVKVSKESTNSNYSVK | ITSYSLCTPGCKTGALMGC <sup>T</sup> MTKTA <sup>S</sup> CGCHVHISK |

<sup>a</sup> Cysteines are shown in blue, and amino acid substitutions unique to nisin S are highlighted.

**Table S4.** Primers used in this study.

| Primers and PCR products | Nucleotide sequence (5' - 3') and description <sup>a</sup>                                                 | Amplification fragments |
|--------------------------|------------------------------------------------------------------------------------------------------------|-------------------------|
| <b>Primers</b>           |                                                                                                            |                         |
| abp118 $\alpha$ -F       | <b>GCGAATTAATACGACTCACTATAGGGCTTAAGTATAAGGAGGAAAAAATATGAAACGTGGTCC</b><br><u>TAACTGTGTAGGTAAC</u>          | abp118 $\alpha$         |
| abp118 $\alpha$ -R       | <u>AAACCCCTCCGTTTAGAGAGGGGTTATGCTAGTTA</u> TTATAACAAGTAAGTGCTCCGCC                                         | abp118 $\alpha$         |
| abp118 $\beta$ -F        | <b>GCGAATTAATACGACTCACTATAGGGCTTAAGTATAAGGAGGAAAAAATATGAAAAATGGTTA</b><br><u>TGGTGGTAGTGGAAT</u>           | abp118 $\beta$          |
| abp118 $\beta$ -R        | <u>AAACCCCTCCGTTTAGAGAGGGGTTATGCTAGTTA</u> AAAAATGGTTATGGTGGTAGTGGA                                        | abp118 $\beta$          |
| salB-F                   | <b>GCGAATTAATACGACTCACTATAGGGCTTAAGTATAAGGAGGAAAAAATATGAGAAATCCTAT</b><br><u>GATTATATAGATAGC</u>           | salB                    |
| salB-R                   | <u>AAACCCCTCCGTTTAGAGAGGGGTTATGCTAGTTA</u> ACTACAAATATTTTGATTGAGTG                                         | salB                    |
| <b>PCR products</b>      |                                                                                                            |                         |
| abp118 $\alpha$          | T7 promoter and transcription terminator containing the mature sequence of the bacteriocin Abp118 $\alpha$ |                         |
| abp118 $\beta$           | T7 promoter and transcription terminator containing the mature sequence of the bacteriocin Abp118 $\beta$  |                         |
| salB                     | T7 promoter and transcription terminator containing the mature sequence of the peptide SalB                |                         |

<sup>a</sup> T7 promoter is shown in bold; T7 transcription terminator is underlined.

**Table S5.** Growth medium and incubation conditions for the bacterial strains used in this study.

| Strain                                               | Origin <sup>a</sup> | Growth medium | Incubation conditions | Use in this study              |
|------------------------------------------------------|---------------------|---------------|-----------------------|--------------------------------|
| <i>Ligilactobacillus salivarius</i> P1CEA3           | DNBTA               | TSB           | 37 °C/ Anaerobiosis   | Nisin S producer/<br>Indicator |
| <i>Lactococcus lactis</i> BB24                       | DNBTA               | MRS           | 32 °C/ Aerobiosis     | Nisin A producer/<br>Indicator |
| <i>Lactococcus lactis</i> WA2-67                     | DNBTA               | MRS           | 32 °C/ Aerobiosis     | Nisin Z producer/<br>Indicator |
| <i>Ligilactobacillus salivarius</i> PG21             | DNBTA               | MRS           | 37 °C/ Anaerobiosis   | Indicator                      |
| <i>Pediococcus damnosus</i> CECT 4797                | CECT                | MRS           | 32 °C/ Aerobiosis     | Indicator                      |
| <i>Pediococcus pentosaceus</i> FBB61                 | DNBTA               | MRS           | 32 °C/ Aerobiosis     | Indicator                      |
| <i>Enterococcus faecium</i> ER46                     | VISAVET             | MRS           | 37 °C/ Aerobiosis     | Indicator                      |
| <i>Enterococcus faecalis</i> 12Ep11                  | DNBTA               | MRS           | 37 °C/ Aerobiosis     | Indicator                      |
| <i>Listeria seeligeri</i> CECT 917                   | CECT                | BHI           | 37 °C/ Aerobiosis     | Indicator                      |
| <i>Listeria monocytogenes</i> CECT 4032              | CECT                | BHI           | 37 °C/ Aerobiosis     | Indicator                      |
| <i>Listeria innocua</i> CECT 910                     | CECT                | BHI           | 37 °C/ Aerobiosis     | Indicator                      |
| <i>Staphylococcus aureus</i> ZTA11/00117ST           | VISAVET             | BHI           | 37 °C/ Aerobiosis     | Indicator                      |
| <i>Staphylococcus aureus</i> DICM10/00243            | VISAVET             | BHI           | 37 °C/ Aerobiosis     | Indicator                      |
| <i>Staphylococcus epidermidis</i> DICM15/00071       | VISAVET             | BHI           | 37 °C/ Aerobiosis     | Indicator                      |
| <i>Staphylococcus pseudintermedius</i> ICM21/02217   | VISAVET             | BHI           | 37 °C/ Aerobiosis     | Indicator                      |
| <i>Streptococcus suis</i> CECT 958                   | CECT                | BHI           | 37 °C/ Aerobiosis     | Indicator                      |
| <i>Streptococcus suis</i> serotype 1 DICM10/01182-1C | VISAVET             | BHI           | 37 °C/ Aerobiosis     | Indicator                      |
| <i>Streptococcus iniae</i> ATCC 29178                | VISAVET             | BHI           | 37 °C/ Aerobiosis     | Indicator                      |
| <i>Streptococcus agalactiae</i> DICM11/00863         | VISAVET             | BHI           | 37 °C/ Aerobiosis     | Indicator                      |
| <i>Streptococcus dysgalactiae</i> VSE16/01903A       | VISAVET             | BHI           | 37 °C/ Aerobiosis     | Indicator                      |
| <i>Streptococcus equi</i> zooepidermicus VSE16/00697 | VISAVET             | BHI           | 37 °C/ Aerobiosis     | Indicator                      |
| <i>Corynebacterium ulcerans</i> ICM19/00922-1B       | VISAVET             | BHI           | 37 °C/ Aerobiosis     | Indicator                      |
| <i>Corynebacterium pseudotuberculosis</i> Cam2       | VISAVET             | BHI           | 37 °C/ Aerobiosis     | Indicator                      |
| <i>Corynebacterium mastitidis</i> INDA2              | VISAVET             | BHI           | 37 °C/ Aerobiosis     | Indicator                      |
| <i>Corynebacterium bovis</i> AM3                     | VISAVET             | BHI           | 37 °C/ Aerobiosis     | Indicator                      |
| <i>Bacillus cereus</i> ICM17/00252                   | VISAVET             | BHI           | 37 °C/ Aerobiosis     | Indicator                      |
| <i>Trueperella pyogenes</i> ICM17/02091-1            | VISAVET             | BHI           | 37 °C/ Aerobiosis     | Indicator                      |
| <i>Erysipelothrix rhusiopathiae</i> ICM21/01900      | VISAVET             | BHI           | 37 °C/ Aerobiosis     | Indicator                      |
| <i>Clostridium perfringens</i> DICM15/00067-5A       | VISAVET             | BHI           | 37 °C/ Anaerobiosis   | Indicator                      |
| <i>Escherichia coli</i> DH5α                         | Thermofisher        | LB            | 37 °C/ Agitation      | Indicator                      |
| <i>Salmonella paratyphi</i> CECT 554                 | CECT                | BHI           | 37 °C/ Aerobiosis     | Indicator                      |

<sup>a</sup> DNBTA: Departamento de Nutrición, Bromatología y Tecnología de los Alimentos, Facultad de Veterinaria, Universidad Complutense de Madrid (UCM), Madrid, (Spain). VISAVET: Centro de Vigilancia Sanitaria Veterinaria, Universidad Complutense de Madrid (UCM), Madrid, (Spain). CECT: Colección Española de Cultivos Tipo, Valencia, (Spain).

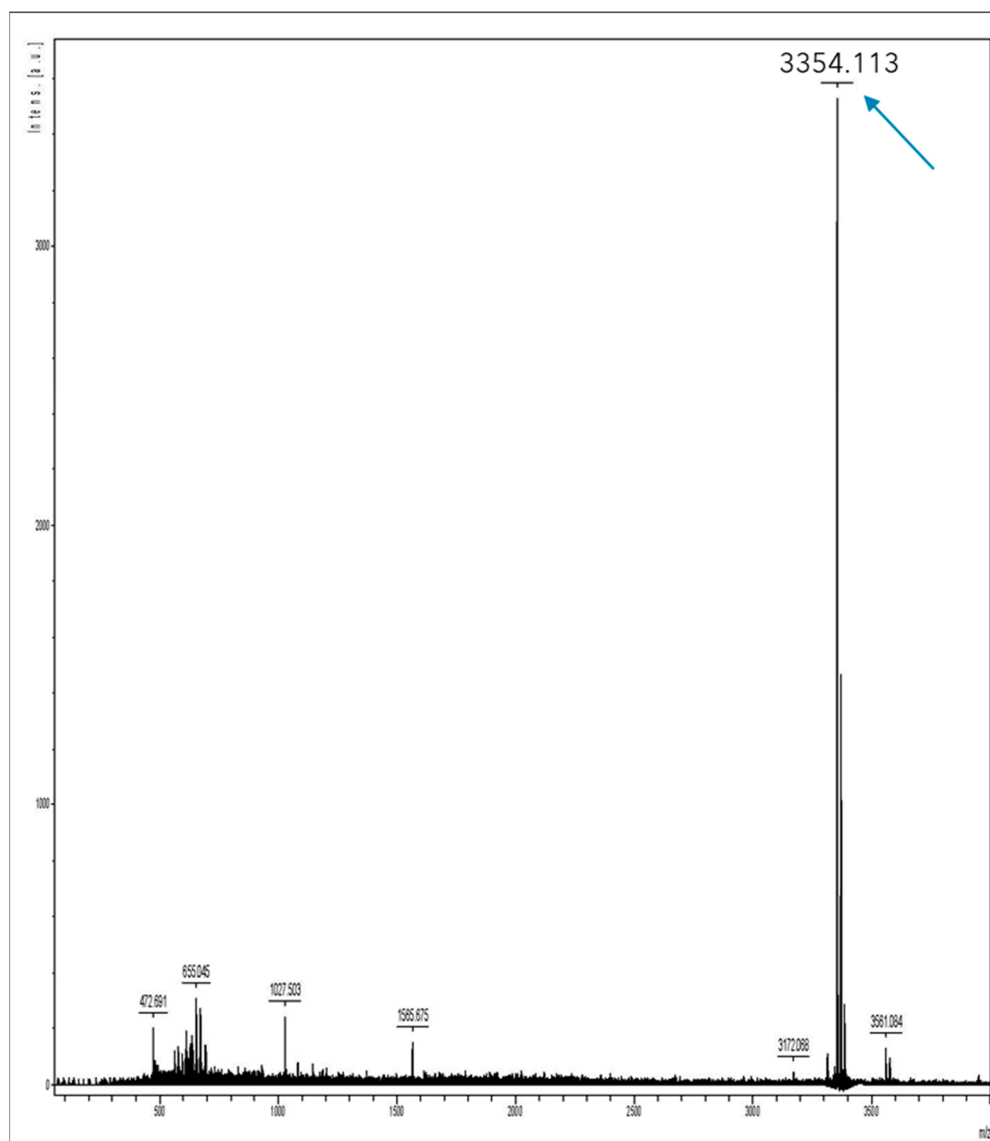

**Figure S1.** MALDI-TOF MS of the RP-FPLC-derived active fraction from the cell-free supernatant (CFS) from *Lactococcus lactis* subsp. *lactis* BB24 (nisin A producer).
